# Supplementary material for: Adjustable Parameters and the Effectiveness of Adjunct Robot-Assisted Gait Training in Individuals with Chronic Stroke
Source: MDPI journal article supplement (doi:10.3390/ijerph19138186), 2022-07-04
Supplement: s1 [file s1]

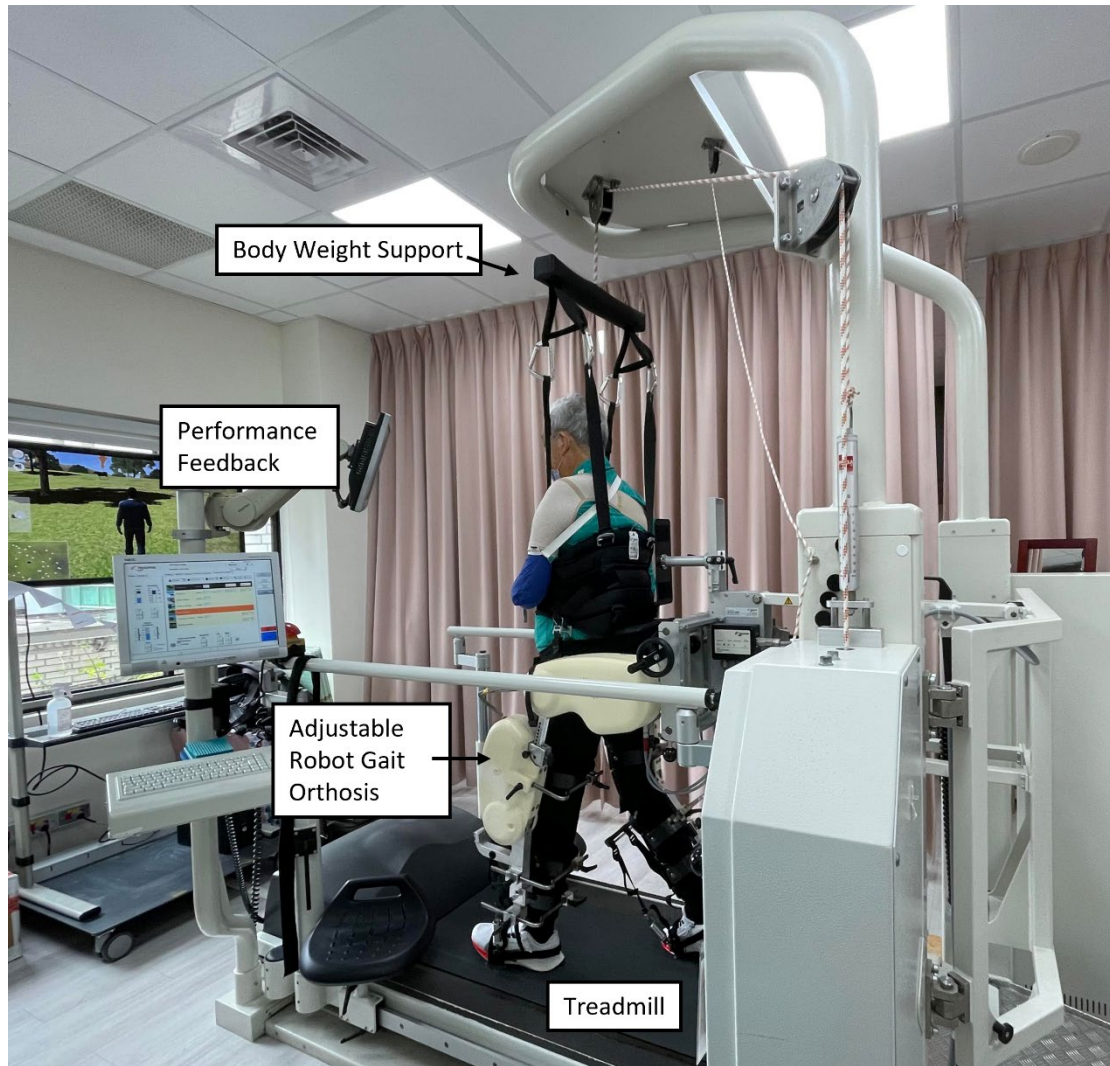

**Figure S1.** The RAGO training set up. The RAGO training used a body-weight support (BWS) system to support body weight, electromechanical gait orthosis to drive legs on the sagittal plane of the treadmill, a mirror, and a screen with a display of the speed, force, and bilateral hip and knee motion to provide visual feedback regarding the gait pattern. Patient consent for publication of medical photography was obtained.
